# Supplementary material
Source: publisher figshare collection journal article supplement (https://acs.figshare.com/ndownloader/files/5472323)
Supplement: Supplementary file 1 [file 5472323]

# Supporting Information of

## A Wearable Electrochemical Platform for Non-Invasive Simultaneous Monitoring of $\text{Ca}^{2+}$ and pH

*Hnin Y. Y. Nyein<sup>1,2,3‡</sup>, Wei Gao<sup>1,2,3‡</sup>, Ziba Shahpar<sup>1</sup>, Sam Emaminejad<sup>1,2,3,4</sup>, Samyuktha Challa<sup>4</sup>, Kevin Chen<sup>1,2,3</sup>, Hossain M. Fahad<sup>1,2</sup>, Li-Chia Tai<sup>1,3</sup>, Hiroki Ota<sup>1,2,3</sup>, Ronald W. Davis<sup>4</sup>, Ali Javey<sup>1,2,3\*</sup>*

<sup>1</sup>Department of Electrical Engineering and Computer Sciences, University of California, Berkeley, California 94720, USA.

<sup>2</sup>Berkeley Sensor and Actuator Center, University of California, Berkeley, California 94720, USA.

<sup>3</sup>Materials Sciences Division, Lawrence Berkeley National Laboratory, Berkeley, California 94720, USA.

<sup>4</sup>Stanford Genome Technology Center, Stanford School of Medicine, Palo Alto, California 94304, USA

### **Table of Contents:**

Figure S1. Long-term stability of  $\text{Ca}^{2+}$  and pH sensors.

Figure S2. pH sensor tested with Ag/AgCl and PVB reference electrodes in varying  $[\text{Cl}^-]$  solutions.

Figure S3. Temperature dependence of  $\text{Ca}^{2+}$  and pH sensor.

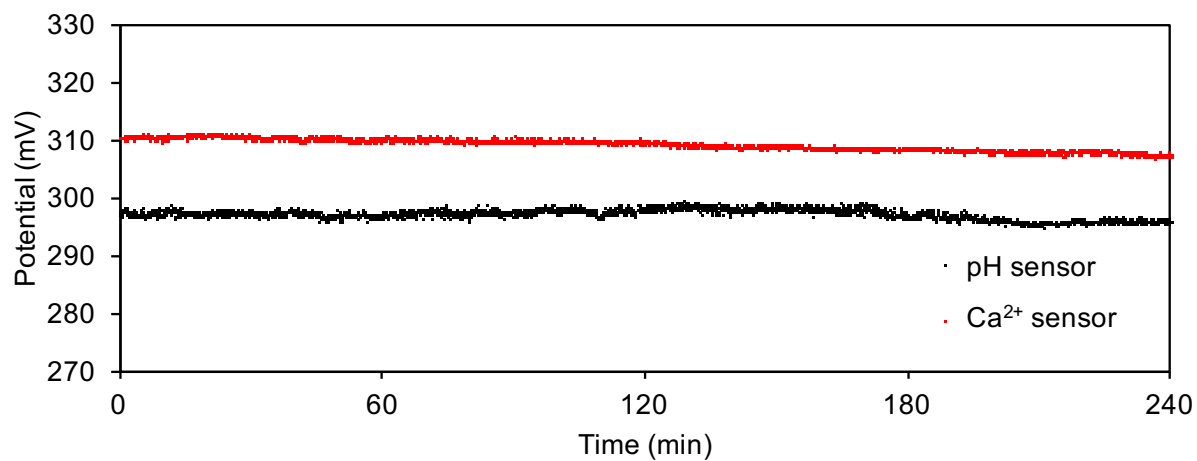

Figure S1. Long-term stability of Ca<sup>2+</sup> and pH sensors in 0.01 M acetate buffer containing 1 mM CaCl<sub>2</sub> in 4 hours. Potential is reported with respect to a standard Ag/AgCl reference electrode.

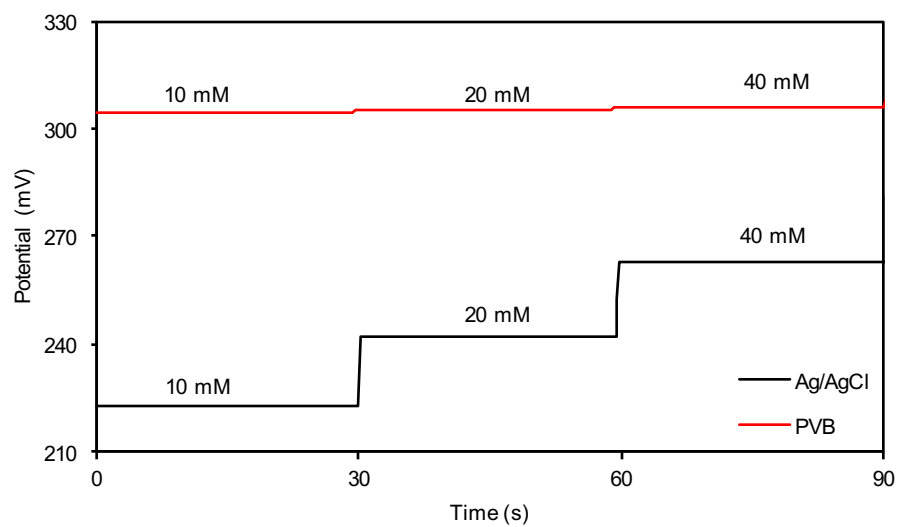

Figure S2. pH sensor tested with Ag/AgCl and PVB reference electrodes in McIlvaine's buffer of pH 5.0 with varying concentration of NaCl. Potential is reported with respect to a standard Ag/AgCl reference electrode.

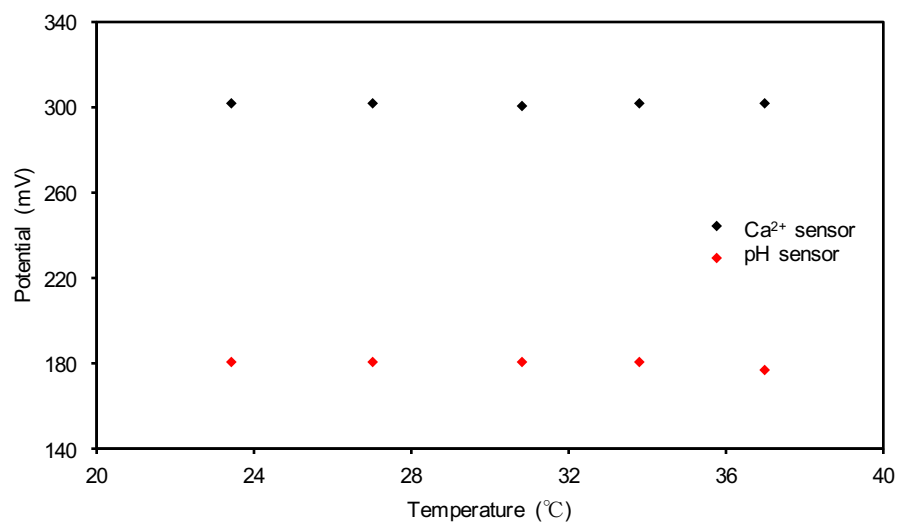

Figure S3. Temperature dependence of  $\text{Ca}^{2+}$  and pH sensor in a solution containing 0.5 mM  $\text{Ca}^{2+}$  in McIlvaine's buffer of pH 5.0.
